# Supplementary material for: USP7 Induces Chemoresistance in Triple-Negative Breast Cancer via Deubiquitination and Stabilization of ABCB1
Source: MDPI journal article supplement (doi:10.3390/cells11203294), 2022-10-19
Supplement: s1 [file s1]

## Supplementary Figures

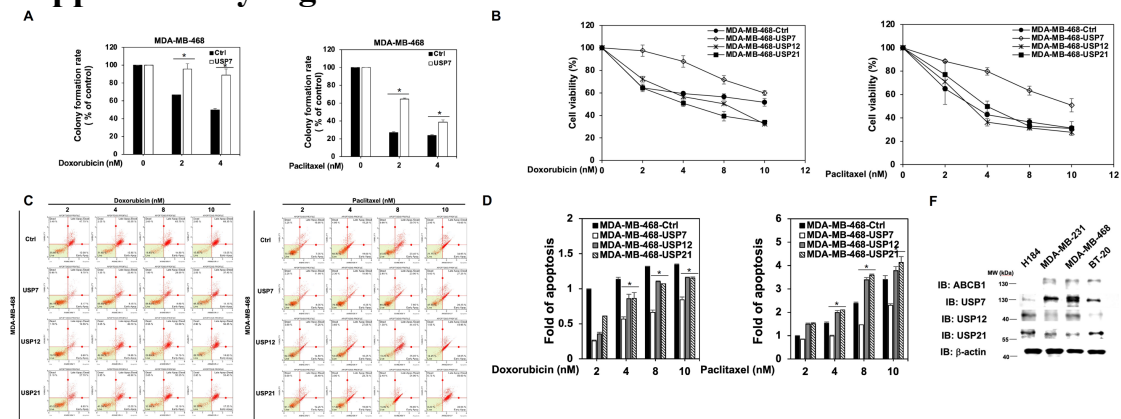

**Supplementary figure S1. The role of USP family members in MDA-MB-468 cells under chemo-drug treatment.** (A) Analysis of colony formation in MDA-MB-468 cells with transient expression of USP7 under doxorubicin and paclitaxel treatment, respectively. Analysis of cell viability (B) and apoptotic (C, D) assays in MDA-MB-468 cells with transient expression of USP7, USP12, and USP21 under doxorubicin (left) and paclitaxel (right) treatment, respectively (F) Expressions of ABCB1, USP7, USP12, and USP21 in breast cell lines. \*:  $P$ -value  $<0.05$ , compared with control cells.

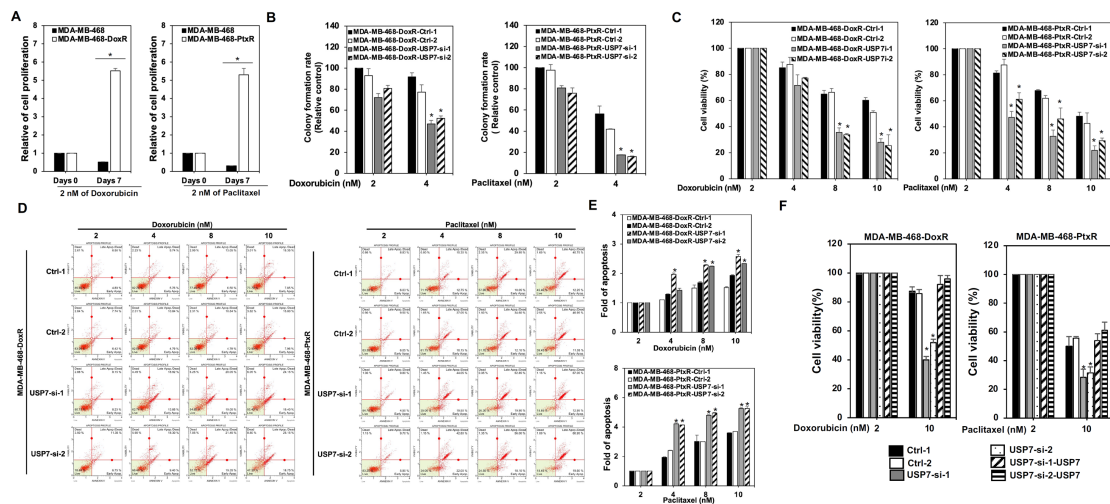

**Supplementary figure S2. The role of USP7 in chemoresistant activity of MDA-MB-468 cells with chemo-drug resistance.** (A) Analysis of the viability of doxorubicin-resistant MDA-MB-468 (left) and paclitaxel-resistant MDA-MB-468 (right) cells treated with 2 nM of doxorubicin or 2 nM of paclitaxel for 7 days compared with parental MDA-MB-468 cells, assessed using MTT assays. Analysis of colony formation (B), viability (C), and apoptotic (D, E) activities in doxorubicin- and paclitaxel-resistant MDA-MB-468-USP7-silencing cells under doxorubicin and paclitaxel treatment. (F) Cell viability of doxorubicin- and paclitaxel-resistant MDA-MB-468-USP7-silencing cells with re-expression of USP7 under 10 nM of doxorubicin and paclitaxel treatment, respectively. \*  $P$ -value  $<0.05$ , compared with control cells.

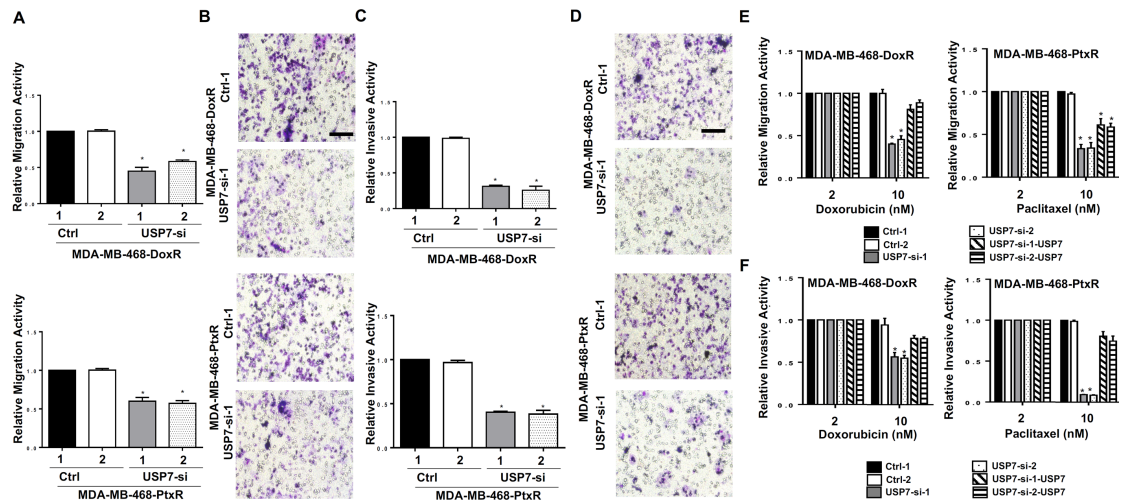

**Supplementary figure S3. The role of USP7 in migration and invasive activity of chemo-drug-resistant MDA-MB-468 cells.** Analysis of migration (A, B) and invasive (C, D) activities in doxorubicin- and paclitaxel-resistant MDA-MB-468-USP7-silencing cells. Analysis of migration (E) and invasive (F) activities in doxorubicin- and paclitaxel-resistant MDA-MB-468-USP7-silencing cells with re-expression of USP7. \*:  $P$ -value  $<0.05$ , compared with control cells.

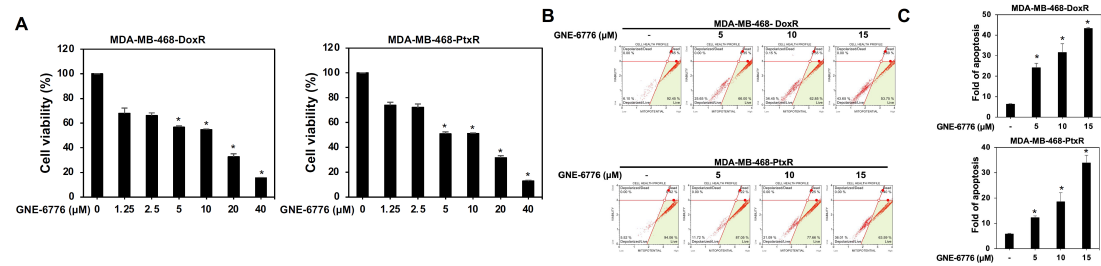

**Supplementary figure S4. The effect of USP7 inhibitor on chemo-drug-resistant MDA-MB-468 cells.** Analysis of viability (A), and apoptotic activities (B, C) in doxorubicin- and paclitaxel-resistant MDA-MB-468 cells under GNE-6776 treatments. \*:  $P$ -value  $<0.05$ , compared with untreated cells.

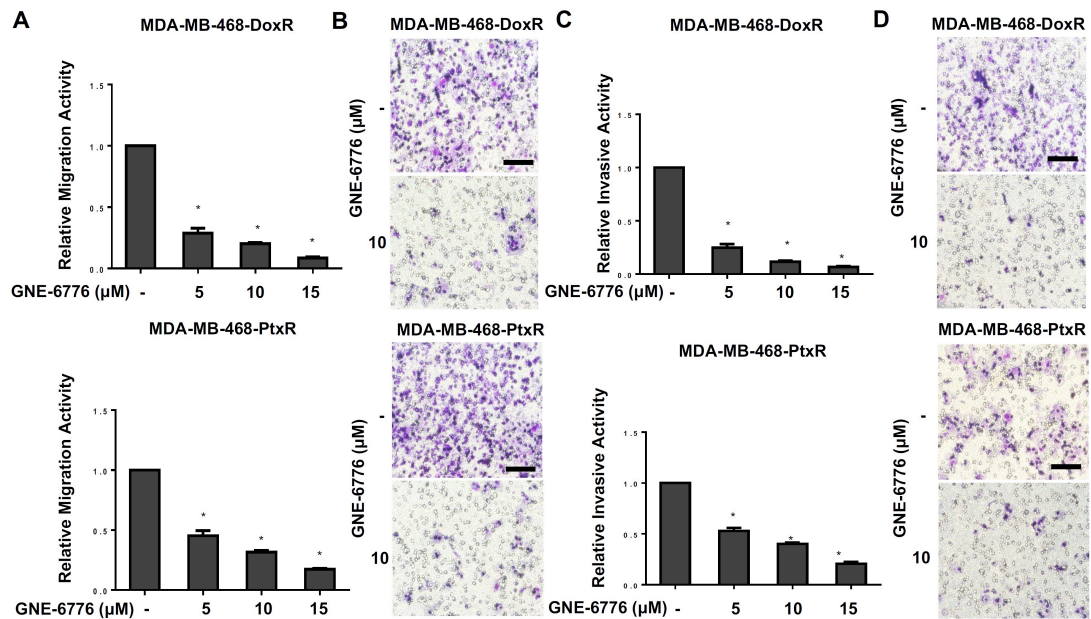

**Supplementary figure S5. The effect of USP7 inhibitor on migration and invasive activities of chemo-drug-resistant MDA-MB-468 cells.** Analysis of migration (A, B) and invasive (C, D) activities in doxorubicin- and paclitaxel-resistant MDA-MB-468 cells under GNE-6776 treatment. \*:  $P$ -value  $<0.05$ ,

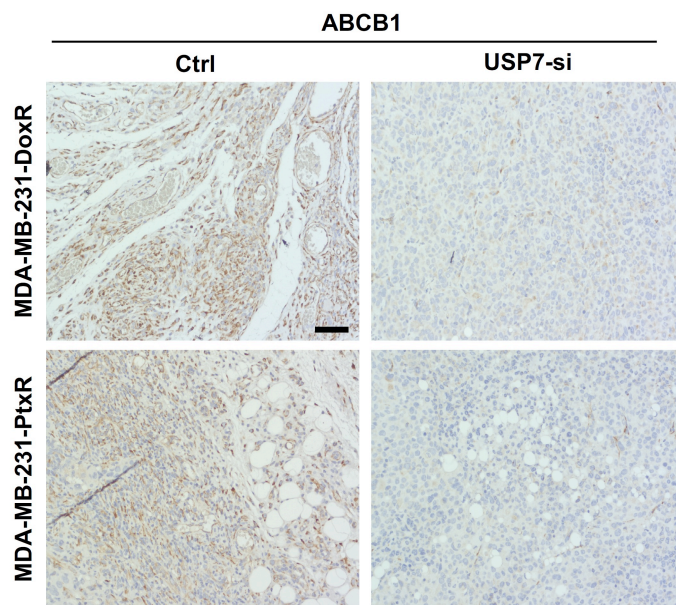

**Supplementary figure S6. Correlation between USP7 and ABCB1 *in vivo*.** Immunohistochemistry staining analysis for ABCB1 in the xenograft system injected with doxorubicin- and paclitaxel-resistant MDA-MB-231-USP7-silencing cells by using anti-ABCB1 antibodies. Scale bar represented 200 μm.

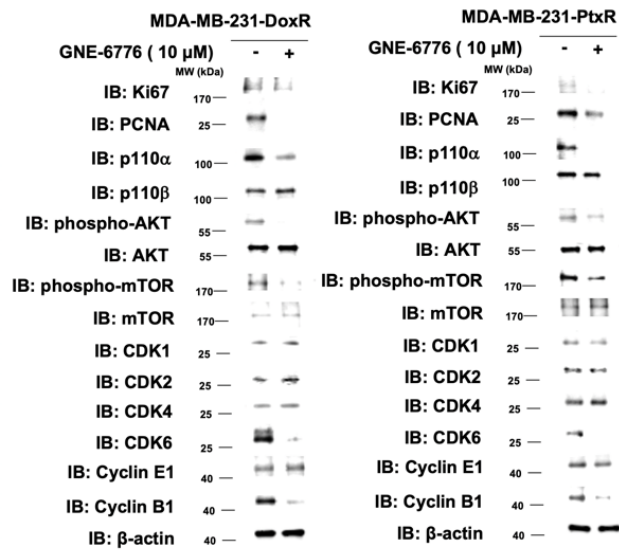

**Supplementary figure S7. Expression of proliferation markers, PI3K/AKT/mTOR signaling, and cell cycle markers in chemo-drug-resistant MDA-MB-468 cells.** The levels of proliferation markers (Ki67 and PCNA), PI3K/AKT/mTOR signaling (p110a, p110b, phosphor-AKT, AKT, phosphor-mTOR, and mTOR), and cell cycles markers (CDK1, CDK2, CDK4, CDK6, Cyclin E1, and Cyclin B1) in doxorubicin- and paclitaxel-resistant MDA-MB-468 cells under 10 mM of GNE-6776 treatment.

## Supplementary Method

### Immunohistochemistry (IHC)

Four μm thick sections of all tissue were cut from the paraffin-embedded specimens for IHC staining. The samples were fixed in 4% paraformaldehyde solution for 24 h. the IHC was performed by by using Mouse and Rabbit Specific HRP/DAB IHC Detection Kit - Micro-polymer (Abcam, ab236466). Briefly, the endogenous peroxidase activity was eliminated with 3% hydrogen peroxide and then incubated with 1% bovine serum albumin and 5% normal goat serum for the blocking step. After reacting with a biotinylated secondary antibody for 1.5 h, antigen-antibody reactions were visualized using streptavidin-horseradish peroxidase conjugate with DAB chromogen. All slides were counterstained with hematoxylin. The antibodies used in IHC were listed in supplementary table 1.



## Supplementary Tables

**Supplementary Table S1. List of proteins tested by and characteristics of the corresponding antibodies**

| Protein            | Assay  | Origin                            | Dilution | Incubation period |
|--------------------|--------|-----------------------------------|----------|-------------------|
| E-cadherin         | WB     | #3195, Cell signaling             | 1:500    | 4°C, Overnight    |
| Vimentin           | WB     | A19607, ABclonal                  | 1:500    | 4°C, Overnight    |
| N-cadherin         | WB     | #610920, BD biosciences           | 1:500    | 4°C, Overnight    |
| Plakoglobin        | WB     | ab184919, abcam                   | 1:2000   | 4°C, Overnight    |
| $\beta$ -actin     | WB     | #3700, Cell Signaling             | 1:2000   | 4°C, Overnight    |
| Bcl-2              | WB     | #2872, Cell Signaling Technology  | 1:500    | 4°C, Overnight    |
| Bcl-xL             | WB     | #2764, Cell Signaling Technology  | 1:500    | 4°C, Overnight    |
| BAX                | WB     | #2772, Cell Signaling Technology  | 1:500    | 4°C, Overnight    |
| BIM                | WB     | #2819, Cell Signaling Technology  | 1:500    | 4°C, Overnight    |
| cleaved PARP       | WB     | #5625, Cell Signaling Technology  | 1:500    | 4°C, Overnight    |
| cleaved Caspase-7  | WB     | #9491, Cell Signaling Technology  | 1:500    | 4°C, Overnight    |
| cleaved Caspase-3  | WB     | #9661, Cell Signaling Technology  | 1:500    | 4°C, Overnight    |
| cleaved Caspase-9  | WB     | #9505, Cell Signaling Technology  | 1:500    | 4°C, Overnight    |
| Flag               | WB,IP  | TA50011-100,Origene               | 1:500    | 4°C, Overnight    |
| HA                 | WB, IP | #05-904, millipore                | 1:500    | 4°C, Overnight    |
| USP7               | WB     | A300-033A, Bethyl                 | 1:2000   | 4°C, Overnight    |
| Ub K48             | WB     | #05-1307, millipore               | 1:500    | 4°C, Overnight    |
| t-Bid              | WB     | ab10640, abcam                    | 1:500    | 4°C, Overnight    |
| ABCB1              | WB     | #12683, Cell Signaling Technology | 1:1000   | 4°C, Overnight    |
| ABCG2              | WB     | E-AB-30393, Elabscience           | 1:500    | 4°C, Overnight    |
| ABCC1              | WB     | #14685, Cell Signaling Technology | 1:500    | 4°C, Overnight    |
| GST                | WB     | #13-6700, Thermo Fisher           | 1:2000   | 4°C, Overnight    |
| ABCB1              | IHC    | #12683, Cell Signaling Technology | 1:400    | 4°C, Overnight    |
| PI3K p100 $\alpha$ | WB     | #4249, Cell signaling             | 1:500    | 4°C, Overnight    |
| PI3K p100 $\beta$  | WB     | #3011, Cell signaling             | 1:500    | 4°C, Overnight    |
| phospho-mTOR       | WB     | #2976, Cell Signaling             | 1:500    | 4°C, Overnight    |
| mTOR               | WB     | #2983, Cell Signaling             | 1:500    | 4°C, Overnight    |
| phospho-AKT        | WB     | #4060, Cell Signaling             | 1:500    | 4°C, Overnight    |

|           |    |                                   |        |                |
|-----------|----|-----------------------------------|--------|----------------|
| AKT       | WB | #9272, Cell Signaling             | 1:500  | 4°C, Overnight |
| Ki67      | WB | ab92742, abcam                    | 1:2000 | 4°C, Overnight |
| PCNA      | WB | GTX100539, Genetex                | 1:400  | 4°C, Overnight |
| CDK1      | WB | #9116, Cell signaling             | 1:2000 | 4°C, Overnight |
| CDK2      | WB | #2546, Cell signaling             | 1:2000 | 4°C, Overnight |
| CDK4      | WB | #12790, Cell signaling            | 1:1000 | 4°C, Overnight |
| CDK6      | WB | #13331, Cell signaling            | 1:2000 | 4°C, Overnight |
| Cyclin E1 | WB | #4129, cell signaling             | 1:1000 | 4°C, Overnight |
| Cyclin B1 | WB | #4138, cell signaling             | 1:1000 | 4°C, Overnight |
| ABCB1     | WB | #12683, Cell Signaling Technology | 1:1000 | 4°C, Overnight |

Abbreviations:

WB, Western blot; IP: Immunoprecipitation; IHC: Immunohistochemistry

**Supplementary Table S2. Sequence of the oligonucleotides for Quantitative real-time PCR assays**

| Target     |         | 5' to 3'                    |
|------------|---------|-----------------------------|
| 18s rRNA   | Forward | <b>GTAACCCGTTGAACCCCAT</b>  |
|            | Reverse | <b>CCATCCAATCGGTAGTAGCG</b> |
| ABCB1 mRNA | Forward | <b>GCTCCTGACTATGCCAAAGC</b> |
|            | Reverse | <b>TCTTCACCTCCAGGCTCAGT</b> |

**Supplementary Table S3. List of plasmid constructs used.**

| Plasmid            | Vector     |
|--------------------|------------|
| Flag-USP21         | pFlag-CMV2 |
| Flag-USP12         | pFlag-CMV6 |
| Flag-USP7          | pFlag-CMV2 |
| Flag-USP7 1-500    | pFlag-CMV2 |
| Flag-USP7 500-1100 | pFlag-CMV2 |
| GST-USP7 1-209     | pGEX4T1    |
| GST-USP7 210-500   | pGEX4T1    |
